# Supplementary material
Source: PubMed Central journal article supplement (PMC4187812)
Supplement: IAI.01699-14_zii999090828so1.pdf [file IAI.01699-14_zii999090828so1.pdf]

Supplementary material for Kamruzzaman *et al.*,

**RS1 satellite phage promotes diversity of toxigenic *Vibrio cholerae* by driving CTX prophage loss and elimination of lysogenic immunity**

Table S1-S4, Figure S1

**Table S1.** Description of *Vibrio cholerae* strains and plasmids included in the study

| Strain/plasmid                                                                     | Description                                                                                                                                 | Reference             |
|------------------------------------------------------------------------------------|---------------------------------------------------------------------------------------------------------------------------------------------|-----------------------|
| pRS1-Km                                                                            | Replicative form of the RS1 satellite phage genome carrying a kanamycin resistance (Km <sup>R</sup> ) gene cassette in an intergenic region | 1                     |
| pRstC                                                                              | A 454 bp <i>Ban</i> II fragment of pRS1-Km containing the <i>rstC</i> gene cloned into pUC18                                                | This study            |
| O395 (pRS1-Km)                                                                     | Strain O395 carrying pRS1-Km                                                                                                                | 1                     |
| pCTX-Km                                                                            | Replicative form of genetically marked CTX $\Phi$ genome derived from strain SM44                                                           | 2                     |
| pCTX-Cm                                                                            | Replicative form of genetically marked CTX $\Phi$ genome carrying a chloramphenicol resistance gene                                         | This study            |
| O395 (pCTX-Km)                                                                     | Strain O395 carrying the RF of CTX-Km $\Phi$ derived from strain SM44                                                                       | 2                     |
| MJ-1236, MJ-1485, MG-116926, G-7555, MG-116226, G-3985, P-27457, Syria-3, AK-17334 | <i>Vibrio cholerae</i> O1 El Tor biotype strains                                                                                            | Laboratory collection |
| AR-02214021, AL-11089,                                                             | <i>Vibrio cholerae</i> O139 clinical isolates                                                                                               | Laboratory collection |
| RV508                                                                              | <i>V. cholerae</i> O1 classical biotype strain which constitutively express CT, TCP and other toxR regulated gene products                  | Laboratory collection |
| O395, S224                                                                         | <i>V. cholerae</i> O1 classical biotype strains                                                                                             | Laboratory collection |
| O395-NT                                                                            | Derivative of classical biotype strain O395 carrying a kanamycin resistance marker in the CTX prophage.                                     | 3                     |
| CTX-Km $\Phi$                                                                      | Km <sup>R</sup> -marked CTX $\Phi$                                                                                                          | 1                     |
| RS1-Km $\Phi$                                                                      | Km <sup>R</sup> -marked RS1 $\Phi$                                                                                                          | 1                     |

**Table S2.** *V. cholerae* strains sequenced with Illumina Next-Generation Sequencing to determine assemblages of phage genetic islands and junctions.

| Strain ID | Strain                                 | Description                                                                                                                                 | Accession #  |
|-----------|----------------------------------------|---------------------------------------------------------------------------------------------------------------------------------------------|--------------|
| G7555     | G7555                                  | Wild type                                                                                                                                   | SAMN02630754 |
| SF20011   | G7555 $\Delta$ CTX-                    | Lost CTX                                                                                                                                    | SAMN02630755 |
| SF20012   | G7555 $\Delta$ CTX-RS1-TLC)            | Lost CTX, RS1, TLC                                                                                                                          | SAMN02630756 |
| SF20013   | G7555 $\Delta$ CTX + CTX-Kan           | G7555 CTX- reinfected with Kan <sup>R</sup> labeled CTX $\phi$                                                                              | SAMN02630757 |
| SF20014   | G7555 $\Delta$ CTX + 0395 NT DNA       | Total DNA of 0395 NT (CTX marked with Kan <sup>R</sup> gene disrupting <i>ctxAB</i> ) used to transform (G7555 CTX-) using chitin induction | SAMN02630758 |
| SF20015   | G7555 $\Delta$ CTX-RS1- TLC) + CTX-Kan | (G7555 CTX <sup>-</sup> RS1 <sup>-</sup> TLC <sup>-</sup> ) reinfected with Kan <sup>R</sup> labeled CTX $\phi$                             | SAMN02630759 |
| P27457    | P27457                                 | Wild type                                                                                                                                   | SAMN02630760 |
| SF20016   | P27457 $\Delta$ CTX                    |                                                                                                                                             | SAMN02630761 |
| SF20017   | P27457 $\Delta$ CTX + CTX-Kan          | (P27457 CTX-) reinfected with Kan <sup>R</sup> labeled CTX $\phi$                                                                           | SAMN02630762 |

**Table S3.** Susceptibility of RS1-mediated non-toxicogenic derivatives of various toxigenic *V. cholerae* strains to CTX-Km $\phi$  under in vitro laboratory conditions

| Parent Strain | CTX negative derivatives | Frequency of Transduction |
|---------------|--------------------------|---------------------------|
| MG-116926     | SF2                      | $5.6 \times 10^{-5}$      |
| MG-116226     | SF3A                     | $2.1 \times 10^{-4}$      |
| MG-116226     | SF3B                     | $2.9 \times 10^{-4}$      |
| G-7555        | SF20011                  | $3.6 \times 10^{-4}$      |
| G-3985        | SF69-2                   | $1.5 \times 10^{-4}$      |
| P-27457       | SF20017                  | $2.3 \times 10^{-4}$      |
| P-27457       | SF20019                  | $1.3 \times 10^{-4}$      |

**Table S4.** Acquisition of CTX<sup>class</sup> phage genome by nontoxic derivatives of El Tor strains arising from RS1 phage mediated excision of CTX prophage

| Parent Strain | Nontoxic derivatives | Transformation <sup>a</sup> frequency in the presence of shrimp shell chitin |
|---------------|----------------------|------------------------------------------------------------------------------|
| MG-116926     | SF2                  | 1.6 x 10 <sup>-4</sup>                                                       |
| MG-116226     | SF3A                 | 4.1 x 10 <sup>-4</sup>                                                       |
| AR-02214021   | SF2002               | 6.3 x 10 <sup>-4</sup>                                                       |
| AI-1836       | SF93                 | 2.5 x 10 <sup>-4</sup>                                                       |
| AK-17334      | SF95                 | 7.3 x 10 <sup>-4</sup>                                                       |
| G-7555        | SF20011              | 8.6 x 10 <sup>-4</sup>                                                       |
| G-3985        | SF69-2               | 7.5 x 10 <sup>-4</sup>                                                       |
| P-27457       | SF20017              | 6.5 x 10 <sup>-4</sup>                                                       |

<sup>a</sup>Transformation frequency was based on acquisition of a genetically marked CTX<sup>class</sup> prophage from total genomic DNA of a classical biotype strain in chitin induced transformation. Presence of different representative genes of the prophage was confirmed using DNA probes and PCR assays.

## References.

1. Faruque SM, Asadulghani, Kamruzzaman M, Nandi RK, Ghosh AN, Nair GB, Mekalanos JJ, Sack DA. 2002. RS1 element of *Vibrio cholerae* can propagate horizontally as a filamentous phage exploiting the morphogenesis genes of CTXphi. *Infect. Immun.* **70**:163-70.
2. Waldor MK, Mekalanos JJ. 1996. Lysogenic conversion by a filamentous bacteriophage encoding cholera toxin. *Science.* **272**:1910-1914.
3. Mekalanos JJ, Swartz DJ, Pearson GD, Harford N, Groyne F, de Wilde M. 1983. Cholera toxin genes: nucleotide sequence, deletion analysis and vaccine development. *Nature.* **306**:551-557.

A. G7555

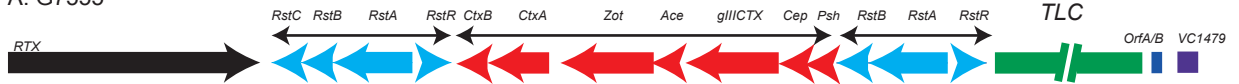

B. G7555 ΔCTX

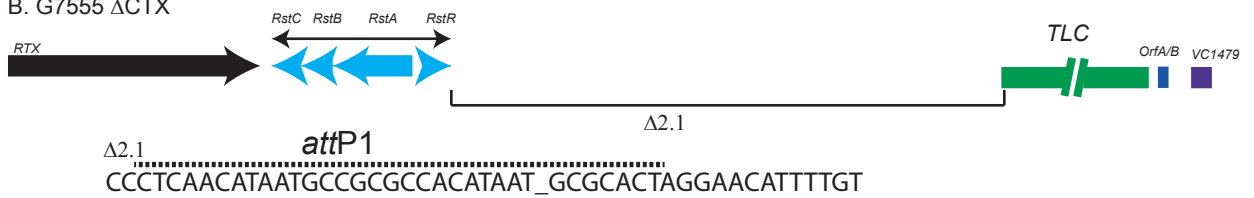

C. G7555 ΔCTX ΔRS1 ΔTLC

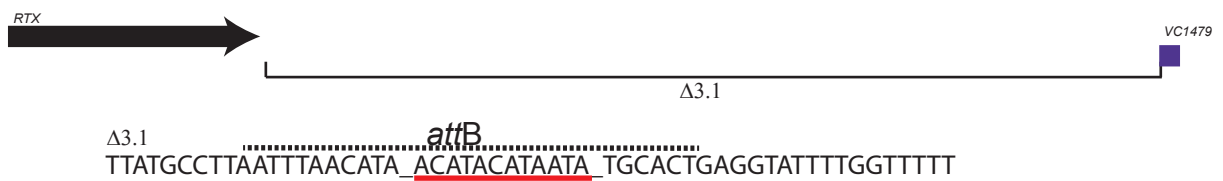

D. G7555 ΔCTX (CTX $\phi$  KanR)

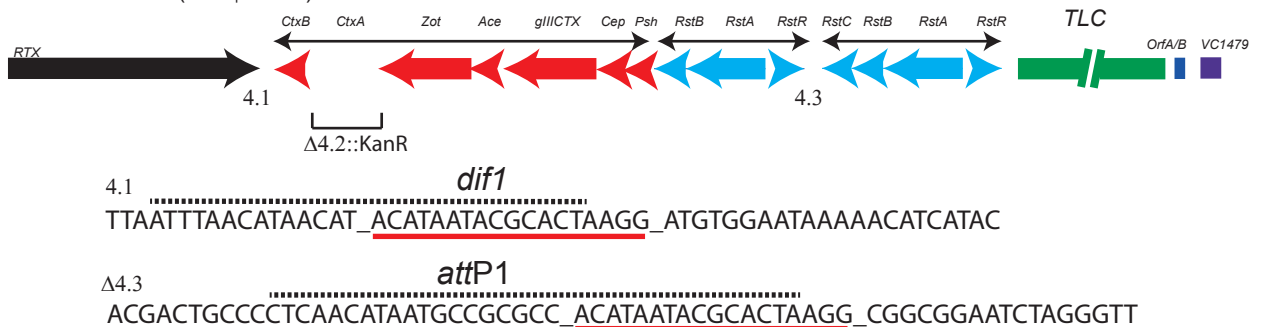

E. G7555 ΔCTX (O395 DNA with CTX $\phi$  KanR)

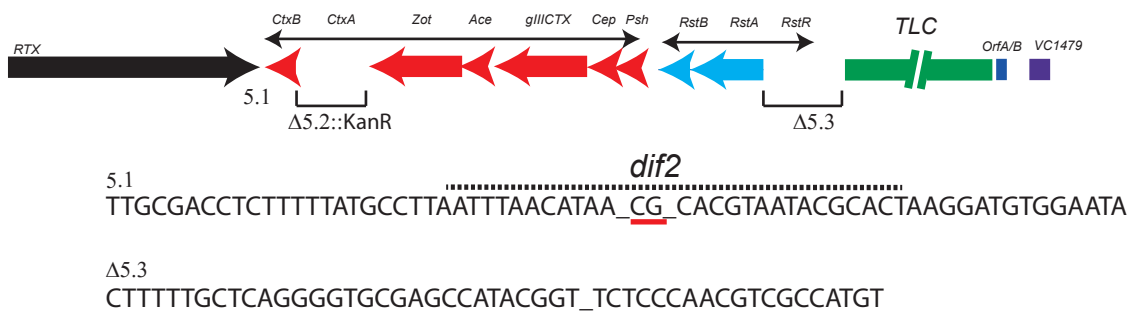

F. G7555 ΔCTX ΔRS1 ΔTLC (CTX $\phi$  KanR)

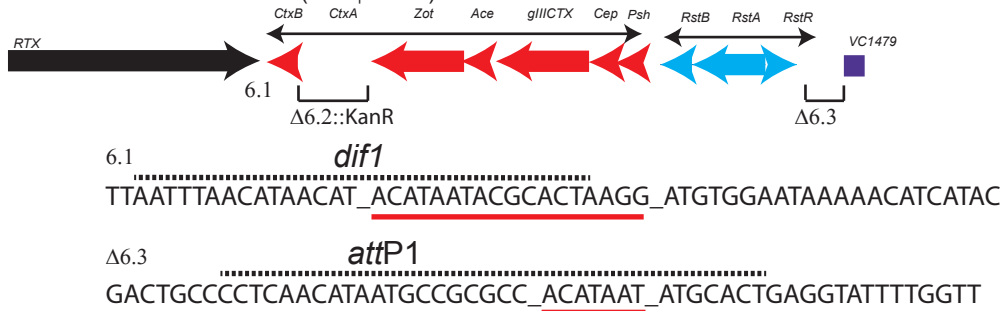

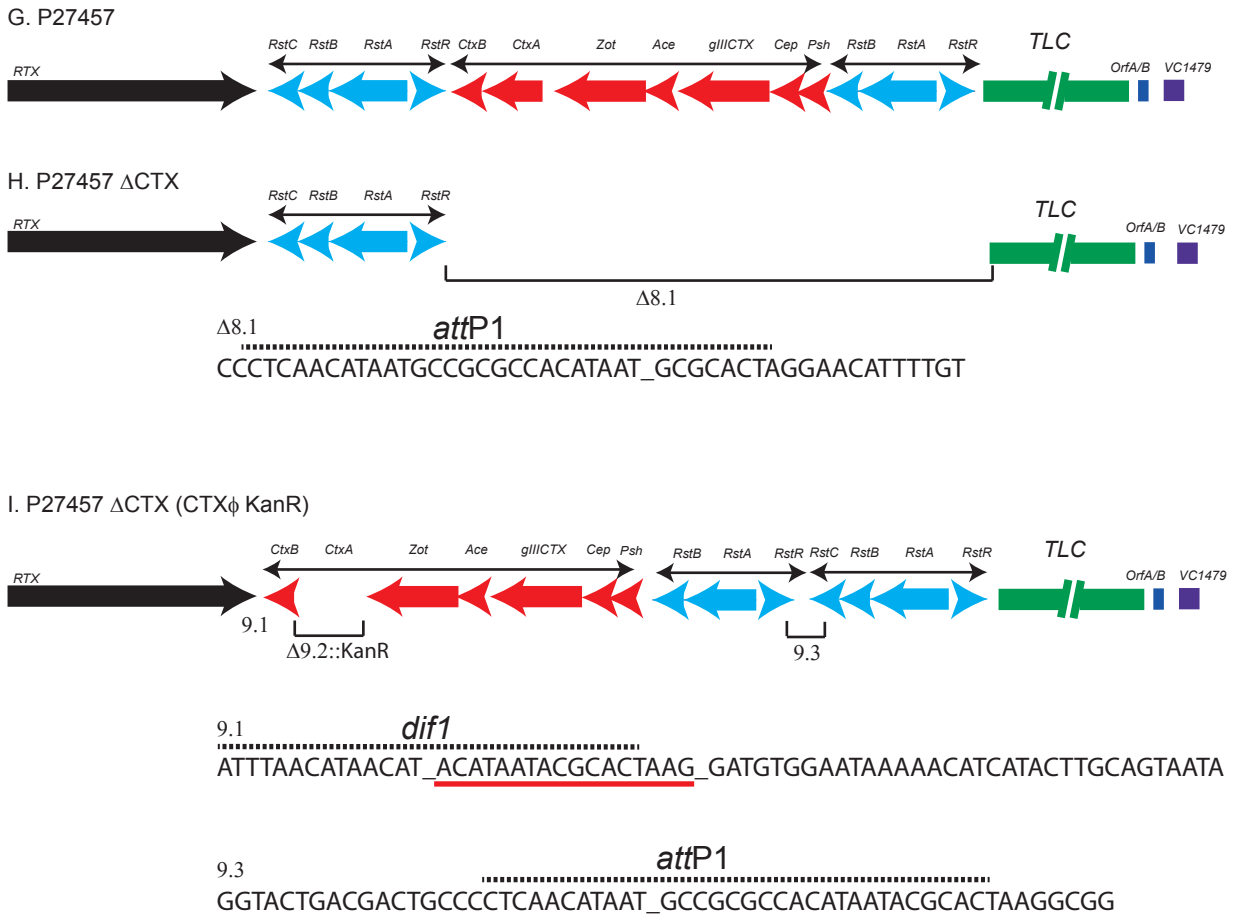

Á

Figure S1. The gene order and sequenced junctions of the CTX/RS1/TLC region of *V.cholerae* El Tor strains G7555 (A,B,C,D,E, & F) and P27457 (G,H, & I) and spontaneous deletions of phage elements. Some strains are derivatives of isolates that have deletions of CTX (B,D,E,H,& I) or CTX/RS1/TLC (C,F). The reacquisition of KanR-marked CTX- $\phi$  phage (D,F, and I) or via chitin-induced DNA uptake of Classical strain CTX- $\phi$  DNA (E) and integration into the genome is also diagrammed and the sequences of newly created junctions are provided. Bacterial and phage attachment sites (*attB/attP*) and *dif* sites are indicated when present and repetitive sequences found in both newly joined sequences are underlined in red
